# Supplementary material for: Surgical gestures as a method to quantify surgical performance and predict patient outcomes
Source: PubMed Central journal article supplement (PMC9780308; doi:10.1038/s41746-022-00738-y), 2022-12-22
Supplement: 41746_2022_738_MOESM1_ESM.pdf [file 41746_2022_738_MOESM1_ESM.pdf]

**Supplementary Table 1.** Demographics of surgeons included in this study

| <b>Features</b><br>Median (range)/Number | <b>Super-experts</b><br>(N=6) | <b>Experts</b><br>(N=15) |
|------------------------------------------|-------------------------------|--------------------------|
| Prior robotic surgical caseload          | 3000 (2000-5800)              | 275 (100-750)            |
| Attending/Fellow                         | 6/0                           | 11/4                     |
| Cases contributed to the study           | 53                            | 27                       |

**Supplementary Table 2.** Separating all cases into four quartiles based on the amount of gestures per case, and comparing 1-year EF recovery rate among groups (p=0.66, Chi-square test).

|                                       | <b>No. of patients who recovered EF at 1 year</b> | <b>No. of patients who did not recover EF at 1 year</b> |
|---------------------------------------|---------------------------------------------------|---------------------------------------------------------|
| Quartile 1<br><i>(least gestures)</i> | 11 (55%)                                          | 9 (45%)                                                 |
| Quartile 2                            | 11 (52%)                                          | 10 (48%)                                                |
| Quartile 3                            | 13 (68%)                                          | 6 (32%)                                                 |
| Quartile 4<br><i>(most gestures)</i>  | 10 (50%)                                          | 10 (50%)                                                |

**Supplementary Table 3.** Comparison of clinical features of patients between experts and super-experts

| Features                 | Experts                              | Super-experts                        | P value |
|--------------------------|--------------------------------------|--------------------------------------|---------|
|                          | Median (IQR) / Count (%)<br>(N = 27) | Median (IQR) / Count (%)<br>(N = 53) |         |
| <b>Patient factors</b>   |                                      |                                      |         |
| Age, year                | 64 (59-68)                           | 63 (59-67)                           | 1.00    |
| BMI, kg/m <sup>2</sup>   | 27.6 (25.7-30.8)                     | 28.1 (25.8-29.8)                     | 0.59    |
| Preop SHIM score         | 24 (19-25)                           | 24 (22-25)                           | 0.43    |
| PSA, ng/mL               | 8.4 (6.5-11.7)                       | 6.2 (5.2-9.8)                        | 0.31    |
| ASA                      |                                      |                                      | 0.84    |
| I                        | 4 (14.8%)                            | 7 (13.2%)                            |         |
| ≥II                      | 23 (85.2%)                           | 46 (86.8%)                           |         |
| Pre-op Gleason score     |                                      |                                      | 0.06    |
| 6 (ISUP 1)               | 11 (40.7%)                           | 9 (17.0%)                            |         |
| 7 (ISUP 2/3)             | 11 (40.7%)                           | 33 (62.3%)                           |         |
| ≥8 (ISUP 4/5)            | 5 (18.5%)                            | 11 (20.8%)                           |         |
| Post-op Gleason score    |                                      |                                      | 0.63    |
| 6 (ISUP 1)               | 4 (14.8%)                            | 6 (11.3%)                            |         |
| 7 (ISUP 2/3)             | 20 (74.1%)                           | 37 (69.8%)                           |         |
| ≥8 (ISUP 4/5)            | 3 (11.1%)                            | 10 (18.9%)                           |         |
| Pathological tumor stage |                                      |                                      | 0.24    |
| pT2                      | 16 (59.3%)                           | 24 (45.3%)                           |         |
| ≥pT3                     | 11 (40.7%)                           | 29 (54.7%)                           |         |
| Prostate volume, g       | 50 (33-67)                           | 39 (34-53)                           | 0.49    |
| <b>Treatment factors</b> |                                      |                                      |         |
| Nerve Sparing Extent     |                                      |                                      | 0.76    |
| Partial                  | 8 (29.6%)                            | 14 (26.4%)                           |         |
| Full                     | 19 (70.4%)                           | 39 (73.6%)                           |         |
| <b>Outcomes</b>          |                                      |                                      |         |
| 1-yr EF Recovery         |                                      |                                      | 0.82    |
| Yes                      | 16 (40.7%)                           | 23 (43.4%)                           |         |
| No                       | 11 (59.3%)                           | 30 (56.6%)                           |         |

Continuous variables were compared by Mann-Whitney U test and reported as median (IQR).

Categorical variables were compared by Chi-square test or Fisher exact test as indicated.

ASA, American Society of Anesthesiology physical status classification system; BMI, Body Mass Index; IQR, Interquartile Range; SHIM, Sexual Health Inventory for Men; ISUP, International Society of Urological Pathology; PSA, Prostate Specific Antigen.

# TRIPOD Checklist: Prediction Model Development and Validation

| Section/Topic                | Item | Checklist Item                                                                                                                                                                                            | Page  |
|------------------------------|------|-----------------------------------------------------------------------------------------------------------------------------------------------------------------------------------------------------------|-------|
| <b>Title and abstract</b>    |      |                                                                                                                                                                                                           |       |
| Title                        | 1    | D;V Identify the study as developing and/or validating a multivariable prediction model, the target population, and the outcome to be predicted.                                                          | 1     |
| Abstract                     | 2    | D;V Provide a summary of objectives, study design, setting, participants, sample size, predictors, outcome, statistical analysis, results, and conclusions.                                               | 4     |
| <b>Introduction</b>          |      |                                                                                                                                                                                                           |       |
| Background and objectives    | 3a   | D;V Explain the medical context (including whether diagnostic or prognostic) and rationale for developing or validating the multivariable prediction model, including references to existing models.      | 5     |
|                              | 3b   | D;V Specify the objectives, including whether the study describes the development or validation of the model or both.                                                                                     | 6     |
| <b>Method</b>                |      |                                                                                                                                                                                                           |       |
| Source of data               | 4a   | D;V Describe the study design or source of data (e.g., randomized trial, cohort, or registry data), separately for the development and validation data sets, if applicable.                               | 14    |
|                              | 4b   | D;V Specify the key study dates, including start of accrual; end of accrual; and, if applicable, end of follow-up.                                                                                        | 14    |
| Participants                 | 5a   | D;V Specify key elements of the study setting (e.g., primary care, secondary care, general population) including number and location of centres.                                                          | 14    |
|                              | 5b   | D;V Describe eligibility criteria for participants.                                                                                                                                                       | 14    |
|                              | 5c   | D;V Give details of treatments received, if relevant.                                                                                                                                                     | 14    |
| Outcome                      | 6a   | D;V Clearly define the outcome that is predicted by the prediction model, including how and when assessed.                                                                                                | 15    |
|                              | 6b   | D;V Report any actions to blind assessment of the outcome to be predicted.                                                                                                                                | 15    |
| Predictors                   | 7a   | D;V Clearly define all predictors used in developing or validating the multivariable prediction model, including how and when they were measured.                                                         | 16    |
|                              | 7b   | D;V Report any actions to blind assessment of predictors for the outcome and other predictors.                                                                                                            | 17    |
| Sample size                  | 8    | D;V Explain how the study size was arrived at.                                                                                                                                                            |       |
| Missing data                 | 9    | D;V Describe how missing data were handled (e.g., complete-case analysis, single imputation, multiple imputation) with details of any imputation method.                                                  | NA    |
| Statistical analysis methods | 10a  | D Describe how predictors were handled in the analyses.                                                                                                                                                   | 16-18 |
|                              | 10b  | D Specify type of model, all model-building procedures (including any predictor selection), and method for internal validation.                                                                           | 16-18 |
|                              | 10c  | V For validation, describe how the predictions were calculated.                                                                                                                                           | NA    |
|                              | 10d  | D;V Specify all measures used to assess model performance and, if relevant, to compare multiple models.                                                                                                   | 16-18 |
|                              | 10e  | V Describe any model updating (e.g., recalibration) arising from the validation, if done.                                                                                                                 | NA    |
| Risk groups                  | 11   | D;V Provide details on how risk groups were created, if done.                                                                                                                                             | NA    |
| Development vs. validation   | 12   | V For validation, identify any differences from the development data in setting, eligibility criteria, outcome, and predictors.                                                                           | NA    |
| <b>Results</b>               |      |                                                                                                                                                                                                           |       |
| Participants                 | 13a  | D;V Describe the flow of participants through the study, including the number of participants with and without the outcome and, if applicable, a summary of the follow-up time. A diagram may be helpful. | 6     |
|                              | 13b  | D;V Describe the characteristics of the participants (basic demographics, clinical features, available predictors), including the number of participants with missing data for predictors and outcome.    | 6     |
|                              | 13c  | V For validation, show a comparison with the development data of the distribution of important variables (demographics, predictors and outcome).                                                          | 7     |
| Model development            | 14a  | D Specify the number of participants and outcome events in each analysis.                                                                                                                                 | 7     |
|                              | 14b  | D If done, report the unadjusted association between each candidate predictor and outcome.                                                                                                                | NA    |
| Model specification          | 15a  | D Present the full prediction model to allow predictions for individuals (i.e., all regression coefficients, and model intercept or baseline survival at a given time point).                             | NA    |
|                              | 15b  | D Explain how to use the prediction model.                                                                                                                                                                | 8     |
| Model performance            | 16   | D;V Report performance measures (with CIs) for the prediction model.                                                                                                                                      | 8     |
| Model-updating               | 17   | V If done, report the results from any model updating (i.e., model specification, model performance).                                                                                                     | NA    |
| <b>Discussion</b>            |      |                                                                                                                                                                                                           |       |
| Limitations                  | 18   | D;V Discuss any limitations of the study (such as nonrepresentative sample, few events per predictor, missing data).                                                                                      | 13    |
| Interpretation               | 19a  | V For validation, discuss the results with reference to performance in the development data, and any other validation data.                                                                               | NA    |
|                              | 19b  | D;V Give an overall interpretation of the results, considering objectives, limitations, results from similar studies, and other relevant evidence.                                                        | 11-12 |
| Implications                 | 20   | D;V Discuss the potential clinical use of the model and implications for future research.                                                                                                                 | 13    |
| <b>Other information</b>     |      |                                                                                                                                                                                                           |       |
| Supplementary information    | 21   | D;V Provide information about the availability of supplementary resources, such as study protocol, Web calculator, and data sets.                                                                         | 19    |
| Funding                      | 22   | D;V Give the source of funding and the role of the funders for the present study.                                                                                                                         | 21    |

\*Items relevant only to the development of a prediction model are denoted by D, items relating solely to a validation of a prediction model are denoted by V, and items relating to both are denoted D;V. We recommend using the TRIPOD Checklist in conjunction with the TRIPOD Explanation and Elaboration document.
